# Supplementary material
Source: PubMed Central journal article supplement (PMC521640)
Supplement: nar_32_17_4955__1.pdf [file nar_32_17_4955__1.pdf]

**Appendix B. Enrichment of top 25 GC-rich PWMs on the c-Myc/Max mode-1 subset.**

|                      |                |                                          |
|----------------------|----------------|------------------------------------------|
| PWM: M00695 (        | ETF),          | GC_cont = 0.87, p-val = 6.92e-009        |
| PWM: M00649 (        | MAZ),          | GC_cont = 0.82, p-val = 8.66e-002        |
| PWM: M00470 (        | AP-2gamma),    | GC_cont = 0.82, p-val = 1.13e-004        |
| PWM: M00469 (        | AP-2alpha),    | GC_cont = 0.80, p-val = 2.81e-002        |
| PWM: M00189 (        | AP-2),         | GC_cont = 0.79, p-val = 1.80e-004        |
| PWM: M00196 (        | Sp1),          | GC_cont = 0.79, p-val = 6.29e-010        |
| PWM: M00652 (        | Nrf-1),        | GC_cont = 0.76, p-val = 3.21e-007        |
| PWM: M00322 (        | c-Myc/Max),    | GC_cont = 0.75, p-val = 5.74e-062        |
| PWM: M00051 (        | ),             | GC_cont = 0.74, p-val = 1.47e-002        |
| PWM: M00644 (        | LBP-1),        | GC_cont = 0.74, p-val = 9.65e-002        |
| PWM: M00428 (        | E2F-1),        | GC_cont = 0.74, p-val = 9.12e-001        |
| PWM: M00726 (        | USF2),         | GC_cont = 0.72, p-val = 6.52e-007        |
| PWM: M00008 (        | Sp1),          | GC_cont = 0.72, p-val = 1.59e-003        |
| PWM: M00245 (        | Egr-3),        | GC_cont = 0.72, p-val = 1.86e-004        |
| PWM: M00698 (        | HEB),          | GC_cont = 0.70, p-val = 3.92e-001        |
| PWM: M00431 (        | E2F-1),        | GC_cont = 0.70, p-val = 3.37e-002        |
| PWM: M00650 (        | MTF-1),        | GC_cont = 0.70, p-val = 6.80e-001        |
| PWM: M00246 (        | Egr-2),        | GC_cont = 0.69, p-val = 2.14e-002        |
| PWM: M00083 (        | MZF1),         | GC_cont = 0.68, p-val = 7.21e-001        |
| <b>PWM: M00243 (</b> | <b>Egr-1),</b> | <b>GC_cont = 0.68, p-val = 3.36e-008</b> |
| PWM: M00646 (        | LF-A1),        | GC_cont = 0.67, p-val = 7.45e-001        |
| PWM: M99996 (        | cMyc-E-Box),   | GC_cont = 0.67, p-val = 6.52e-007        |
| PWM: M00665 (        | Sp3),          | GC_cont = 0.67, p-val = 4.06e-002        |
| PWM: M00651 (        | NF-muE1),      | GC_cont = 0.67, p-val = 2.11e-001        |
| PWM: M00341 (        | GABP),         | GC_cont = 0.66, p-val = 1.61e-004        |
