# Supplementary material
Source: PubMed Central journal article supplement (PMC521640)
Supplement: nar_32_17_4955__2.pdf [file nar_32_17_4955__2.pdf]

| Gene  | Region      | Primers                                                |              | E-Box position | c-Myc M00322 hits                      |              | EGR-1 M00243 hits   |          |
|-------|-------------|--------------------------------------------------------|--------------|----------------|----------------------------------------|--------------|---------------------|----------|
|       |             | Sequence                                               | Position     |                | Sequence (strand)                      | Position     | Sequence (strand)   | Position |
| RAP2B | Promoter    | CCACGTGCTTCTCGCAGAG<br>GAGCGAGGAAAGCGCTGTAG            | -675<br>-581 | -674           | GCCACGCGCG<br>(+)                      | -296         | CTGCGGAGGTGG<br>(-) | -250     |
|       | Control     | AGTCCGGGAGAACCATATGAAG<br>GGCAGAAAAGGAACCCGATC         | 1782<br>1882 |                |                                        |              |                     |          |
| KPNA3 | Promoter    | CCAGGTCCGGCTCCATTT<br>ATGACCCTGCCCTCTTCCC              | -318<br>-235 | -174           | GCCGCGCGCG<br>(+)<br>GCCGCGCGCC<br>(+) | -449<br>-153 | TTGTGGGGGCGG<br>(+) | -499     |
|       | Control     | CATATTGGCCATGCACCCA<br>AGGATGGATGGTCGTTAAGCA           | 6647<br>6731 |                |                                        |              |                     |          |
| POLH  | Promoter I  | GCATATAAGCATAAGGGTACCAGAGG<br>GCTTCGTTCTTTATGGTCTCTCCT | -877<br>-774 | -752           | GCCACGCGCC<br>(+)                      | -277         | CCGCGTGGGCGG<br>(+) | -489     |
|       | Promoter II | GCGGGATCTACACGTGCG<br>GTCCCTATGCTGCTTCTCATCTC          | -762<br>-604 |                |                                        |              |                     |          |
|       | Control     | TCAGTCATGCCTATCCAATGAAGT<br>TCCTTTTGCTCCTATCCAGCAG     | 3246<br>3327 |                |                                        |              |                     |          |
| PTPN1 | Promoter    | GTCGAAATTCTCGATCGCTGA<br>ACCGGCAGCCGGA ACT             | -58<br>25    | ---            | CCCACGCGCC<br>(+)                      | -225         | AAGCGGAGGAGG<br>(+) | -151     |
|       | Control     | GCTGTGAAGAGAACGACTTCC<br>CACAAAGCAAATGTCTCCTCC         | 945<br>1057  |                |                                        |              |                     |          |

|       |             |                                                      |              |                      |                   |      |                     |       |
|-------|-------------|------------------------------------------------------|--------------|----------------------|-------------------|------|---------------------|-------|
| PP    | Promoter    | GGAAGCAGGTGACTTATCAACG<br>CTGTTCCCTTCGGCTTTGG        | -366<br>-191 | -171                 | GCCACGTGGC<br>(+) | -173 | GCGCGGGGGCGT<br>(+) | -674  |
|       | Control     | GATTATCGGCGCTGACGC<br>CCCGATCCGGGCCTC                | 616<br>687   |                      | GCCGCGTGCG<br>(+) | 53   | GTGCGCAGGCGT<br>(+) | 17    |
| KHSRP | Promoter I  | CTAATCCCCTCGCTGTCTGG<br>AGGAAATCAAAGCGCCAC           | -723<br>-635 | -836<br>-440<br>-346 | GCCACGTGCC<br>(+) | -838 | CGACGTGGGCGG<br>(-) | -747  |
|       | Promoter II | AACTCGTCAGGAATTGGATTAATTG<br>TGGGCGTTAGGTTTGATAGTCG  | -493<br>-393 |                      |                   |      | CGGCGGGGGCGG<br>(+) | 148   |
|       | Control     | CTGACCAACTCCACTGTTATCCAC<br>AACACGCAACCACCACAG       | 1789<br>1885 |                      |                   |      |                     |       |
| MCCC2 | Promoter I  | CACGTGTTAGATGCGATTCACTC<br>GGGCGTTTTGTCCAATTCTTT     | -890<br>-784 | -890<br>-10          | GCCATGTGGG<br>(+) | 136  | -----               | ----- |
|       | Promoter II | TGTCAACACAACCAATCCAAG<br>AGCAGGTCTCCCCGGC            | -206<br>-120 |                      |                   |      |                     |       |
|       | Control     | GAGTCCAGGGTCTTAACTGTTGCT<br>TTTCAACCATAGAACCCACCTAGG | 2617<br>2693 |                      |                   |      |                     |       |
